# Supplementary material for: Investigating the Sole Olefin-Based Cycle in Small-Cage MCM-35-Catalyzed Methanol-to-Olefins Reactions
Source: MDPI journal article supplement (doi:10.3390/molecules29092037), 2024-04-28
Supplement: s1 [file s1]

## **Supporting Information**

# **Investigating the Sole Olefin-Based Cycle in Small-Cage MCM-35-Catalyzed Methanol-to-Olefins Reactions**

Zhaohui Liu\*, Min Mao, Ruixue Yangcheng, Shuang Lv

Institute of Advanced Interdisciplinary Studies, School of Chemistry and Chemical Engineering,  
Chongqing University, Chongqing 400044, China

\*Corresponding author. Email: [zhaohui.liu@cqu.edu.cn](mailto:zhaohui.liu@cqu.edu.cn)

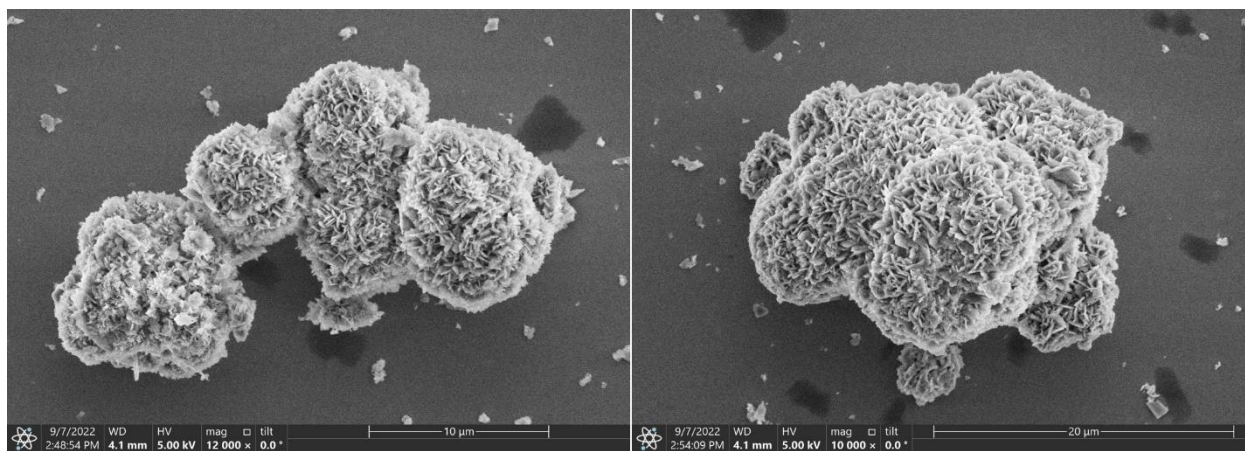

**Figure S1.** SEM images of MCM-35.

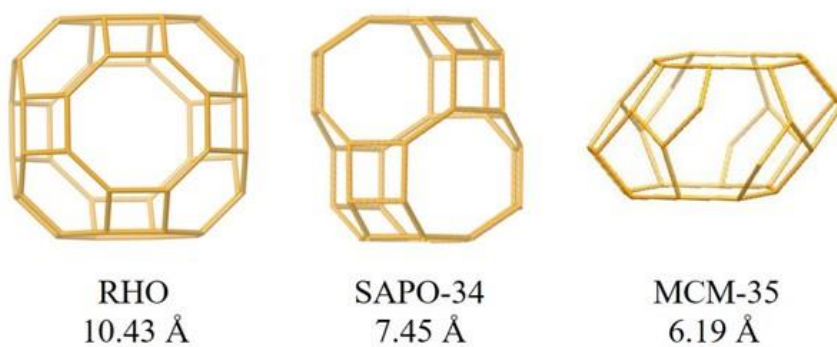

**Figure S2.** Cage sizes of RHO, SAPO-34 and MCM-35 zeolites.

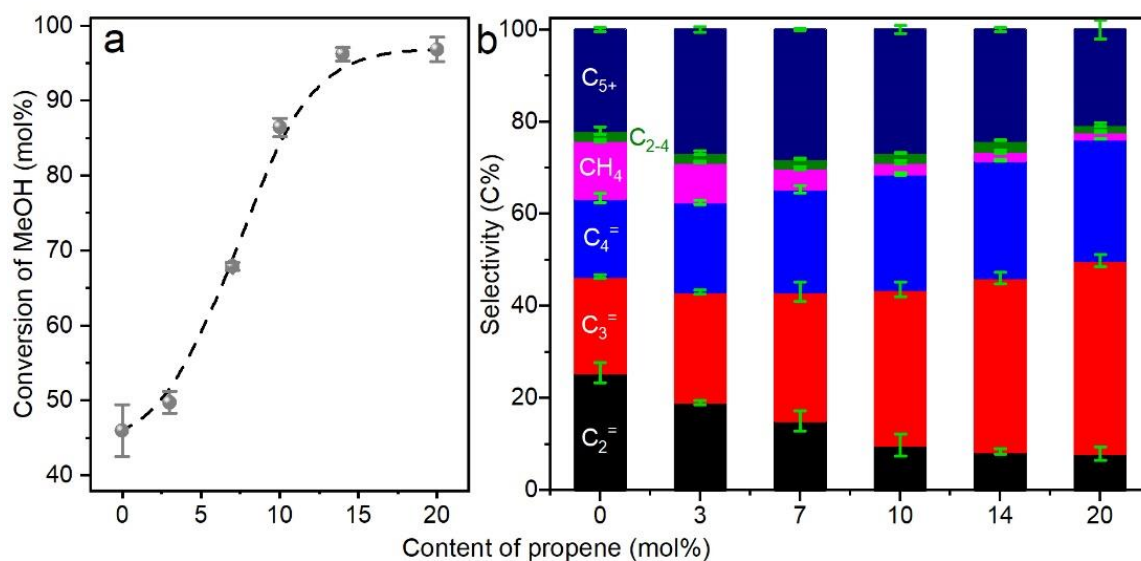

**Figure S3.** Conversion (a) and product distribution (b) of MTO on MCM-35 zeolites with varied amount of propene cofed in methanol. MTO reactions were performed at 500 °C and analyzed at 10 min time-on-stream.

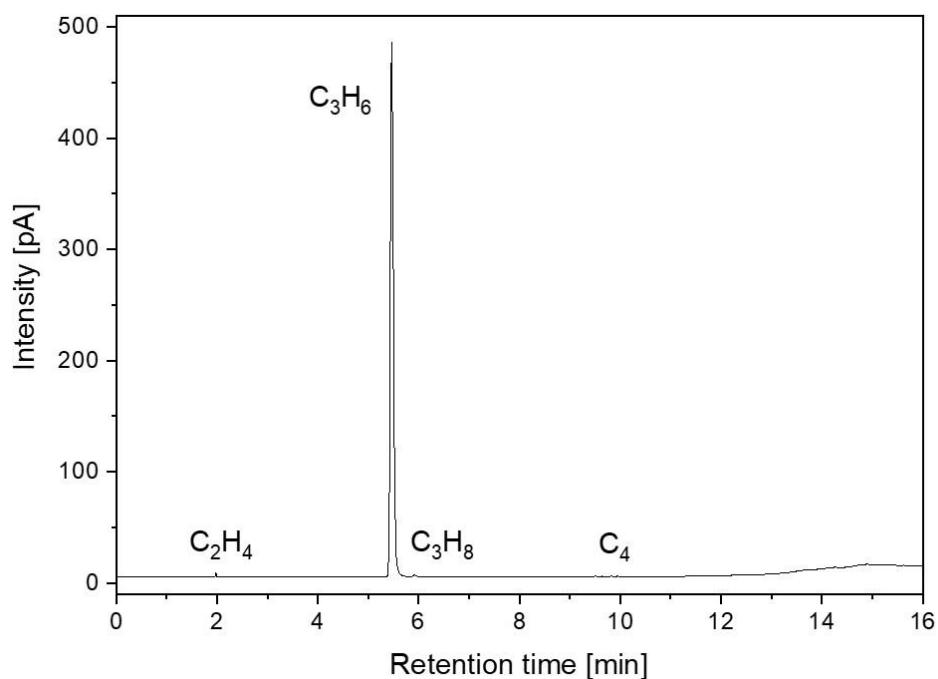

**Figure S4.** Reaction of propene with MCM-35 catalyst. The flow rate of propene is 2 mL/min and the catalyst amount is 100 mg.

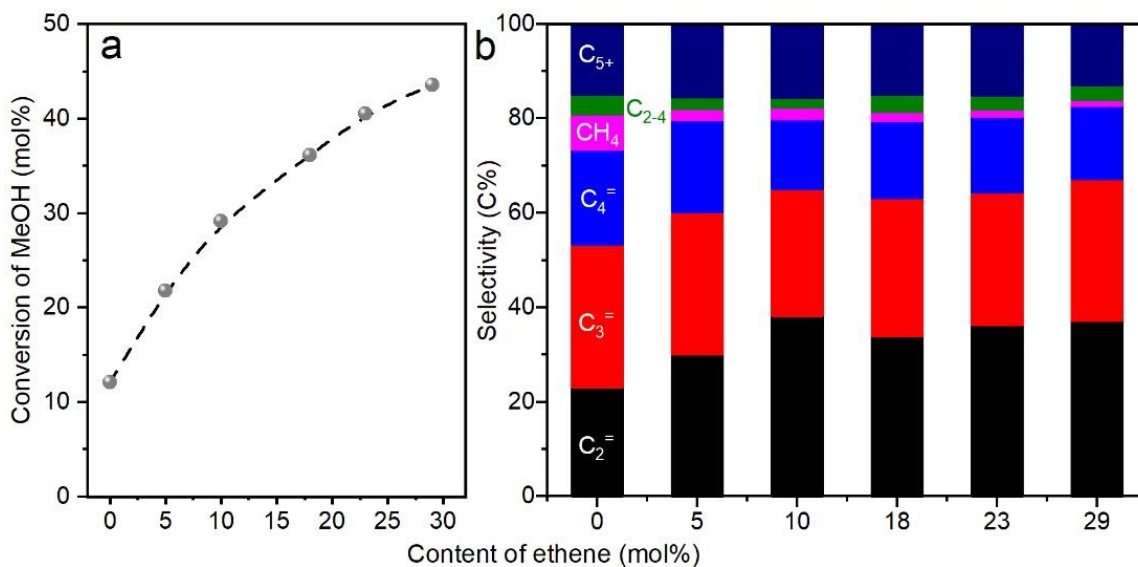

**Figure S5.** Conversion (a) and product distribution (b) of MTO on MCM-35 zeolites with varied amount of ethene cofed in methanol. MTO reactions were performed at 400 °C and analyzed at 10 min time-on-stream.

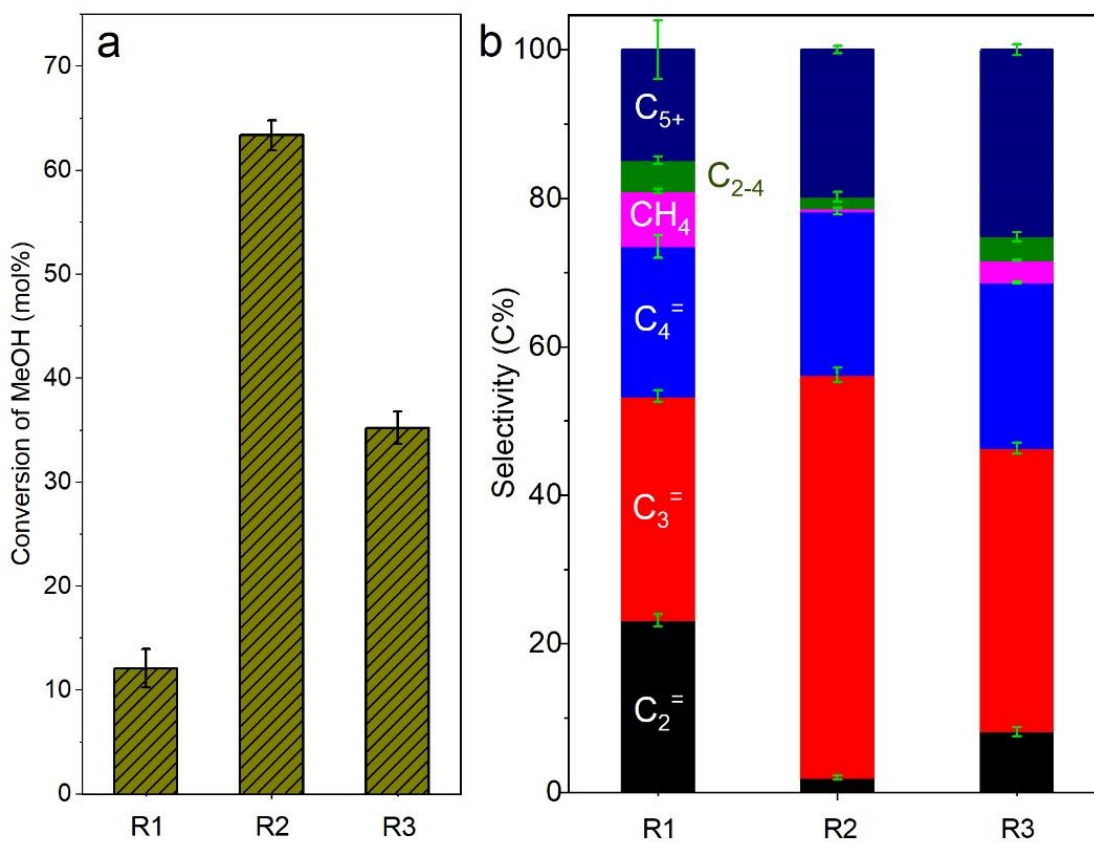

**Figure S6.** Conversion (a) and product distribution (b) of MTO on MCM-35 zeolites. Reaction conditions: R1 with the feedstock of pure methanol (0-10 min), R2 with the feedstock of 86

mol% methanol + 14 mol% propene (0-10 min), R3 with the feedstock of 86 mol% methanol + 14 mol% propene (0-5 min) and switched to pure methanol (5-10 min), MTO reactions were performed at 400 °C and analyzed at 10 min time-on-stream.

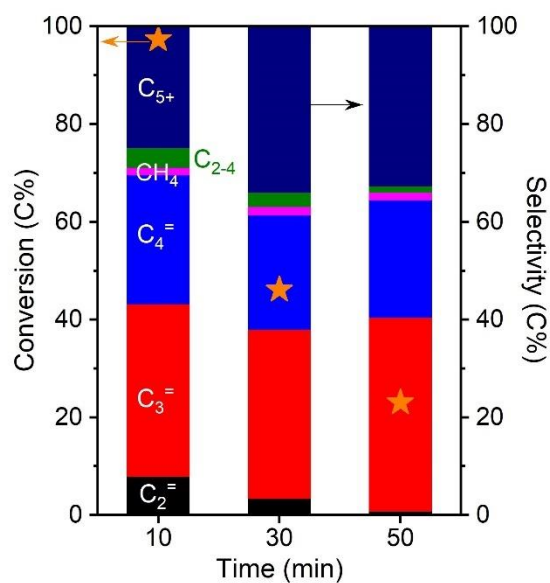

**Figure S7.** The evolution of methanol conversion and product selectivity in MCM-35 catalyzed MTO reaction. MTO reactions were performed at 500 °C and 20% propene was co-fed in methanol.
